# Supplementary material
Source: Springer Nature journal article supplement (https://www.springermedizin.de/resource/supplementary/12947_2012_431_MOESM5_ESM.pdf/9555740)

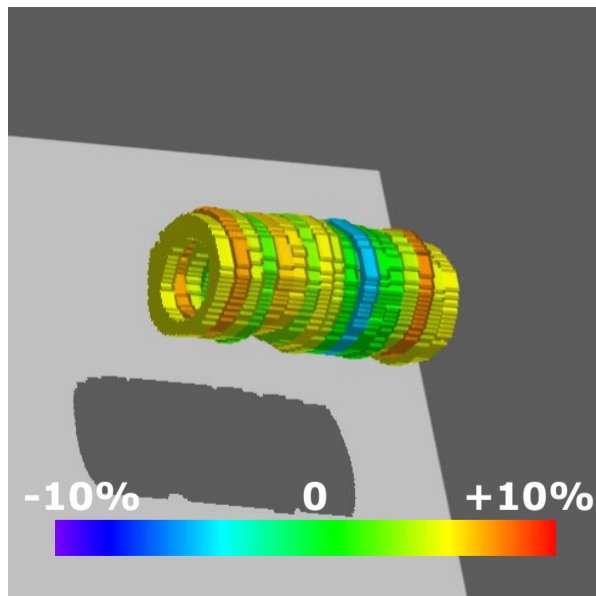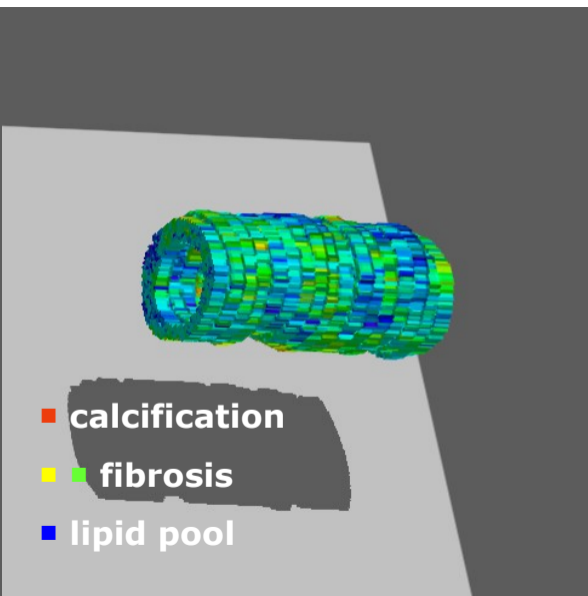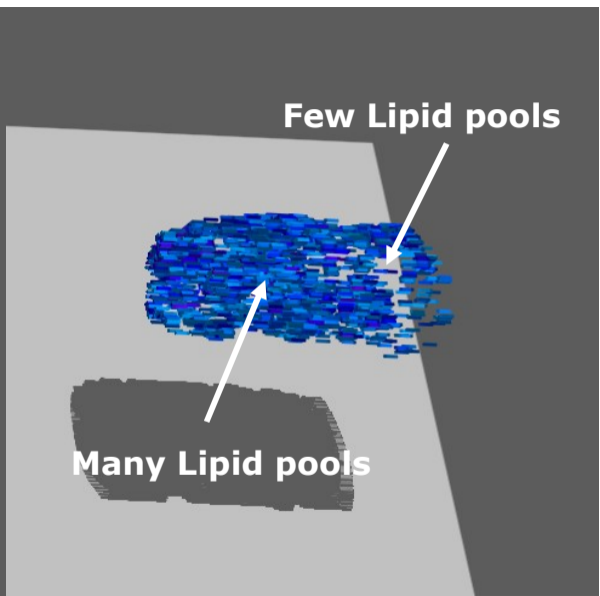

Supplement: MOESM5 [file 9555740]
